# Supplementary material for: Clostridioides difficile Infection Treatment and Outcome Disparities in a National Sample of United States Hospitals
Source: MDPI journal article supplement (doi:10.3390/antibiotics11091203), 2022-09-06
Supplement: s1 [file s1]

**Table S1.** Selected CDI patient characteristics, treatment patterns, and outcomes by study year for index encounters

| Study year                              | 2018<br>(n=14,563) | 2019<br>(n=12,456) | 2020<br>(n=9978) | 2021<br>(n=1767) |
|-----------------------------------------|--------------------|--------------------|------------------|------------------|
| <b>Patient characteristics</b>          |                    |                    |                  |                  |
| Age, median (IQR)                       | 68 (56-79)         | 68 (55-78)         | 68 (56-78)       | 68 (58-78)       |
| Female sex, %                           | 58.3               | 56.6               | 58.0             | 56.9             |
| Race, %                                 |                    |                    |                  |                  |
| Black                                   | 12.1               | 12.4               | 12.5             | 13.3             |
| Other                                   | 6.3                | 7.1                | 6.5              | 6.6              |
| White                                   | 81.6               | 80.5               | 81.1             | 80.1             |
| Hispanic ethnicity, %                   | 3.8                | 5.4                | 8.0              | 6.3              |
| <b>CDI treatments</b>                   |                    |                    |                  |                  |
| CDI therapies, %                        |                    |                    |                  |                  |
| Metronidazole                           | 50.3               | 42.1               | 38.7             | 37.2             |
| Vancomycin                              | 70.3               | 75.7               | 80.3             | 82.6             |
| Fidaxomicin                             | 3.9                | 4.9                | 5.0              | 3.3              |
| Bezlotoxumab                            | 0.1                | <0.1               | <0.1             | 0.0              |
| FMT                                     | 0.2                | 0.1                | 0.1              | 0.0              |
| Costs (USD), median                     |                    |                    |                  |                  |
| Hospital costs                          | 10863              | 10534              | 12533            | 14216            |
| Patient charges                         | 42480              | 41933              | 48012            | 51504            |
| <b>CDI outcomes</b>                     |                    |                    |                  |                  |
| Severe CDI, %                           | 41.0               | 41.2               | 43.2             | 44.1             |
| CDI recurrence, % <sup>a</sup>          | 10.7               | 9.3                | 7.2              | N/A              |
| In-hospital mortality, % <sup>b</sup>   | 6.3                | 5.5                | 6.6              | 8.8              |
| Hospital LOS, median (IQR) <sup>b</sup> | 7 (4-13)           | 7 (4-13)           | 7 (4-14)         | 8 (5-16)         |

CDI=*Clostridioides difficile* infection; IQR=interquartile range

<sup>a</sup> Data represent patients who survived the index visit in 2018-2020 only

<sup>b</sup> Data represent hospitalized patients only
